# Supplementary material
Source: PubMed Central journal article supplement (PMC1299260)
Supplement: 6-7400350s1.pdf [file 6-7400350s1.pdf]

## Supplementary materials

### Yeast strains and molecular biology

#### Yeast strains

To generate Ykt6 mutants a diploid yeast strain carrying a Ykt6 deletion on one allele (BY4743; *MAT a/alpha*; *his3Δ1/his3Δ1*; *leu2Δ0/leu2Δ0 lys2Δ0/LYS2 MET15/met15Δ0 ura3Δ0/ura3Δ0 YKL196c::kanMX4/YKL196c*; EUROSCARF) was transformed with a centromeric pRS416 (URA3) vector encoding Ykt6 under its original promoter. Yeast cells were then sporulated for three days on SPOR plates (0.02% (w/v) raffinose, 0.3% (w/v) KAc) and tetrads were dissected. The resulting haploid cells carrying a *ykt6* deletion complemented by the *pRS416-YKT6pr-YKT6* plasmid (CUY434) were then transformed with pRS413 (HIS3, CEN) or pRS423 (HIS3, 2 $\mu$ ) vector encoding the respective mutants of Ykt6 and selected on SDC-his/-ura. If the mutants were sufficient for survival the *pRS416-YKT6pr-YKT6* vector was removed by growing the cells on 5-fluoroorotic acid (5-FOA). Otherwise both plasmid were maintained by growing the cells in SDC-his/-ura. The Nyv1 transmembrane anchor was replaced by the CCIIM anchor and TAA codon after amino acid 232 by genomic tagging; primers were used to amplify a kanMX-marker from pFA6-kanMX6 (Longtine et al., 1998) that inserted by homologous recombination at the region coding for the Nyv1 transmembrane domain. *APT1* was deleted by transforming wild-type strains with a PCR-amplified URA3 marker with flanking *APT1* sequences to generate BJ3505 *apt1Δ* and DKY6281 *apt1Δ* (Longtine et al., 1998). All other strains were as described in Dietrich et al., 2004.

#### Plasmids and recombinant proteins

To generate *YKT6pr* the 800 nucleotides upstream of the *YKT6* start codon were PCR-amplified with proofreading polymerase (Eppendorf) using primers with EcoR1 (5') and BamH1 (3') restriction sites. The fragment was ligated into EcoR1/BamH1 digested pRS413 and pRS416.

To make *YKT6*, *Ykt6<sup>ACIIM</sup>*, *Ykt6<sup>CAIIM</sup>*, and *Ykt6<sup>AAIIM</sup>* the *YKT6* ORF was amplified using primers with BamH1 (5') and Sac1 (3') sites. The 3' primers encoded for wild-type or modified C-terminal amino acids (CCIIM, ACIIM, CAIIM, AAIIM). All fragments were BamH1/Sac1 inserted into *pRS413-YKT6pr*. In addition, the *YKT6* fragment was BamH1/Sac1 inserted into *pRS416-YKT6pr*.

To generate *pRS423-YKT6pr-Ykt6<sup>GFP</sup>* first an internal BamH1 restriction site was created in *YKT6*. For this two fragments were amplified: The first contains 800 nucleotides upstream of *YKT6*'s start codon and the first 357 nucleotides of *YKT6* (flanked by EcoR1 and BamH1 sites). The second fragment contains nucleotides 361 to 603 of *YKT6* (flanked by BamH1 and Sac1 sites). The fragments were ligated into EcoR1/Sac1 digested *pRS423*. The vector was then BamH1 digested, and one copy of a BamH1/BglIII eGFP cassette, digested from pBS-eGFP (Ed Hurt, Heidelberg, Germany), was inserted. The correct orientation of the inserts was verified by restriction digest.

*GFP<sub>int</sub>YKT6*, *GFP<sub>int</sub>Ykt6<sup>ACIIM</sup>*, *GFP<sub>int</sub>Ykt6<sup>CAIIM</sup>*, and *GFP<sub>int</sub>Ykt6<sup>AAIIM</sup>* were then generated by PCR-amplification of the *YKT6* ORF using primers with BamH1 (5') and EcoR1 (3') sites and *pRS413-YKT6pr-GFP<sub>int</sub>Ykt6* as template. The 3' primers encoded for wild-type or modified C-terminal amino acids (CCIIM, ACIIM, CAIIM, AAIIM). All fragments were BamH1/Sac1 inserted into *pRS423-YKT6pr*.

For overexpression in yeast, YKT6 and Ykt6<sup>AAIM</sup> were PCR amplified from the YKT6 ORF using a 5' primer with SphI and an *His*-tag and 3' primers (BamHI) encoding for wild-type or modified C-terminus (AAIM). Fragments were ligated into pGALPatGIL.

For overexpression in *E. coli*, Ykt6 mutant genes were PCR amplified from the above-mentioned vectors using primers containing BamHI (5') or HindIII (3') restriction sites. The fragments were inserted into a BamHI/HindIII digested pQE30 vector (Ykt6<sup>AAIM</sup>). Proteins were overexpressed in *E. coli* (BL21) in the presence of 1 mM IPTG and purified by Ni-NTA affinity chromatography or glutathione-coated beads as previously described (Veit et al., 2001). Neither tag affected Vac8 or self-palmitoylation activity of Ykt6 *in vitro* (not shown).

All other plasmids and recombinant proteins were as described in Dietrich et al., 2004.

## Figures and Tables

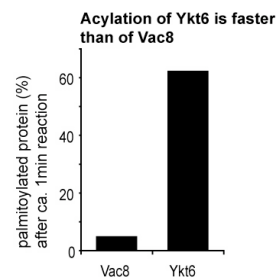

**Figure S1.** Ykt6 palmitoylation precedes Vac8 palmitoylation. The palmitoylation reaction as in Figure 1A was stopped after 1 min, and samples were processed as described. The signals were quantified by using NIH Image 1.63. The signals at 1 min are shown as a percentage of the signals at 30 min (100%).

## Characterization of *apt1*Δ

### A. Morphology

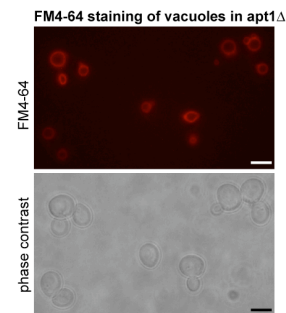

### B. Fusion activity

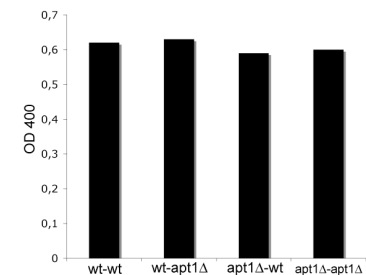

### C. Ykt6 release

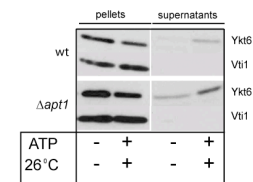

**Figure S2.** Characterization of *apt1*Δ. (A) *In vivo* labeling of *apt1*Δ vacuoles by pulse-chase with FM4-64 (Vida and Emr, 1995). (B) Isolated vacuoles deleted for *apt1* were fused *in vitro*, where OD<sub>400</sub> reflects the fusion activity (Haas, 1995); deletion strains were fused against wild-type reporter strains in the combinations indicated. (C) Protease-deficient (BJ3505) wild-type or *apt1*Δ vacuoles were assayed for Ykt6 release, as in Figure 4.

**Table S1***S. cerevisiae* strains used in this study

| Strain  | Genotype                                                                                                         | Reference          |
|---------|------------------------------------------------------------------------------------------------------------------|--------------------|
| BJ3505  | <i>MATa pep4Δ::HIS3 prb1-Δ1.6R HIS3 lys 2-208 trp1-D101 ura3-52 gal2 can</i>                                     | Haas 1995          |
| DKY6281 | <i>MATa leu2-3 leu2-112 ura3-52 his3-delta200 trp 1-D101 lys 2-801 suc 2-D9 pho8 :: TRP1</i>                     | Haas 1995          |
| BY4743  | <i>MAT a/alpha; his3Δ1/his3Δ1; leu2Δ0/leu2Δ0 lys2Δ0/LYS2 MET15/met15Δ0 ura3Δ0/ura3Δ0 YKL196c::kanMX4/YKL196c</i> | EUROSCARF          |
| CUY322  | BJ3505; <i>APT1::URA3</i>                                                                                        | this study         |
| CUY324  | DKY6281; <i>APT1::URA3</i>                                                                                       | this study         |
| CUY434  | <i>MATa; his3Δ1; leu2Δ0 ura3Δ0 YKL196c::kanMX4/YKL196c; pRS416-YKT6pr-YKT6</i>                                   | this study         |
| CUY579  | CUY434; <i>pRS413- YKT6pr-YKT6</i>                                                                               | this study         |
| CUY581  | CUY434; <i>pRS413-YKT6pr-Ykt6<sup>CAIIM</sup></i>                                                                | this study         |
| CUY580  | CUY434; <i>pRS413- YKT6pr-Ykt6<sup>ACIIM</sup></i>                                                               | this study         |
| CUY587  | CUY434; <i>pRS413- YKT6pr-Ykt6<sup>AAIIM</sup></i>                                                               | this study         |
| CUY437  | BY4743 <i>pep4Δ::HIS3; pGALPatGIL-His-YKT6</i>                                                                   | this study         |
| CUY569  | BY4743 <i>pep4Δ::HIS3; pGALPatGIL-His-Ykt6<sup>AAIIM</sup></i>                                                   | this study         |
| CUY723  | BJ3505; <i>vam3Δ::TRP1, ura3::pRS406-Vam3pr-VAM3-CCIIM</i>                                                       | Rohde et al., 2003 |
| CUY724  | BJ3505; <i>NYV1::CCIIM-kanMX6</i>                                                                                | this study         |
| CUY996  | CUY434; <i>pRS423- YKT6pr- GFP<sub>int</sub> Ykt6<sup>CAIIM</sup></i>                                            | this study         |
| CUY997  | CUY434; <i>pRS423-YKT6pr- GFP<sub>int</sub> Ykt6<sup>ACIIM</sup></i>                                             | this study         |
| CUY998  | CUY434; <i>pRS423- YKT6pr- GFP<sub>int</sub> Ykt6<sup>AAIIM</sup></i>                                            | this study         |
| CUY1208 | CUY434; <i>pRS423- YKT6pr-GFP<sub>int</sub>YKT6</i>                                                              | this study         |

**References:**

- Dietrich, L.E., Gurezka, R., Veit, M. and Ungermann, C. (2004) The SNARE Ykt6 mediates protein palmitoylation during an early stage of homotypic vacuole fusion. *Embo J*, 23, 45-53.
- Haas, A.A. (1995) A quantitative assay to measure homotypic vacuole fusion in vitro. *Methods Cell Sci*, 17, 283-294.
- Rohde, J., Dietrich, L., Langosch, D., and Ungermann, C. (2003) The transmembrane domain of Vam3 affects the composition of cis- and trans-SNARE complexes to promote homotypic vacuole fusion. *J Biol Chem*, 278, 1656-1662.

Longtine, M.S., McKenzie, A., 3rd, Demarini, D.J., Shah, N.G., Wach, A., Brachat, A., Philippsen, P. and Pringle, J.R. (1998) Additional modules for versatile and economical PCR-based gene deletion and modification in *Saccharomyces cerevisiae*. *Yeast*, 14, 953-961.

Veit, M., Laage, R., Dietrich, L., Wang, L. and Ungermann, C. (2001) Vac8p release from the SNARE complex and its palmitoylation are coupled and essential for vacuole fusion. *Embo J*, 20, 3145-3155.

Vida, T.A., and Emr, S. (1995) A new vital stain for visualizing vacuolar membrane dynamics and endocytosis in yeast. *J Cell Biol*, 128, 779-792.
